# Supplementary material for: Conferring High Iaa Productivity on Low-Iaa-Producing Organisms With PonAAS2, an Aromatic Aldehyde Synthase of a Galling Sawfly, and Identification of Its Inhibitor
Source: Preprints.org preprint supplement (doi:10.20944/preprints202305.2074.v1), 2023-05-30
Supplement: Supplementary file 1 [file Table S1.docx]

Table S1. Sequences of promoters used in this study.

| GFP_fw | 5’-CCGGATCCATGAGTAAAGGAGAAGAACT (*Bam*HI) |
| --- | --- |
| GFP_rv | 5’-GTCGACAACACGCGTTCATTTGTATAGTTCGTCCATGC (*Sal*I, *Mlu*I) |
| unc-54-ter_fw | 5’-ACGCGTGTCCAATTACTCTTCAACATC (*Mlu*I) |
| unc-54-ter_rv | 5’-GTCGACAACGGCCACGGTGGCCAAACAGTTATGTTTGGTA (SalI, SfiI) |
| cdc-42-pro_fw | 5’-CCGGTACCCGATTCTAGAGGAGGTCGTCG (KpnI) |
| cdc-42-pro_rv | 5’-CCGGATCCCAACCCCTAGGTTCGCCTGAAAAAAAAAATG (BamHI, BlnI) |
