# Supplementary material for: Conferring High Iaa Productivity on Low-Iaa-Producing Organisms With PonAAS2, an Aromatic Aldehyde Synthase of a Galling Sawfly, and Identification of Its Inhibitor
Source: Preprints.org preprint supplement (doi:10.20944/preprints202305.2074.v1), 2023-05-30
Supplement: Supplementary file 2 [file Table S2.docx]

Table S2. Information of PonAAS2 inhibitors found by the initial screening.

|  | molecular formula | molecular weight | concentration (mM)1 |  |
| --- | --- | --- | --- | --- |
| HTS09643 | C15H11NO6S | 333.3 | 120.0 | 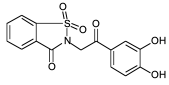 |
| HTS09784 | C13H20N6O | 276.3 | 144.7 | 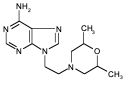 |
| HTS10037 | C14H17NO3 | 247.3 | 161.7 | 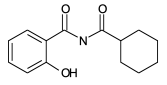 |
| HTS10442 | C12H9NO4 | 231.2 | 173.0 | 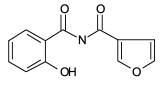 |
| HTS10550 | C16H13N3O2 | 279.3 | 143.2 | 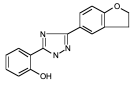 |
| HTS11483 | C11H10ClN3 | 219.7 | 182.1 | 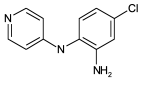 |
| HTS12813 | C12H9N3OS | 243.3 | 164.4 | 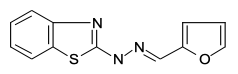 |
| HTS12892 | C11H9NO2S | 219.3 | 182.4 | 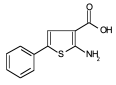 |
| JA00082 | C6H6N4O2 | 166.1 | 240.8 | 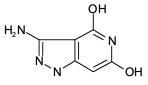 |
| JFD03671 | C16H11N3O | 261.3 | 153.1 | 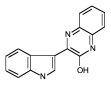 |
| JFD03939 | C9H6INO4S | 351.1 |  | 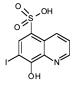 |

1 Concentrations of compounds in the reaction used in the first screening were shown as mM.
